# Supplementary material
Source: PubMed Central journal article supplement (PMC11007652)
Supplement: jama-e244682-s002.pdf [file jama-e244682-s002.pdf]

## Data Sharing Statement

### Data

**Data available:** No

### Additional Information

**Explanation for why data not available:** The Open Payments data are publicly available at <https://openpaymentsdata.cms.gov/>; the refined data file used for our analyses will be made available upon reasonable request to the authors. The Medicare claims data are not publicly available and cannot be shared by the authors. Medicare data are available through the Research Data Assistance Center (<https://resdac.org/>).
